# Supplementary material
Source: publisher figshare collection journal article supplement (https://acs.figshare.com/ndownloader/files/5158993)
Supplement: Supplementary file 1 [file 5158993]

 
data_shelxl
 
_audit_creation_method            SHELXL-97
_chemical_name_systematic
;
 ?
;
_chemical_name_common             ?
_chemical_melting_point           ?
_chemical_formula_moiety          ?
_chemical_formula_sum
 'C50.50 H50 F6 N2 O0.50 P3 Rh'
_chemical_formula_weight          1002.74
 
loop_
 _atom_type_symbol
 _atom_type_description
 _atom_type_scat_dispersion_real
 _atom_type_scat_dispersion_imag
 _atom_type_scat_source
 'C'  'C'   0.0033   0.0016
 'International Tables Vol C Tables 4.2.6.8 and 6.1.1.4'
 'H'  'H'   0.0000   0.0000
 'International Tables Vol C Tables 4.2.6.8 and 6.1.1.4'
 'P'  'P'   0.1023   0.0942
 'International Tables Vol C Tables 4.2.6.8 and 6.1.1.4'
 'Rh'  'Rh'  -1.1178   0.9187
 'International Tables Vol C Tables 4.2.6.8 and 6.1.1.4'
 'F'  'F'   0.0171   0.0103
 'International Tables Vol C Tables 4.2.6.8 and 6.1.1.4'
 'N'  'N'   0.0061   0.0033
 'International Tables Vol C Tables 4.2.6.8 and 6.1.1.4'
 'O'  'O'   0.0106   0.0060
 'International Tables Vol C Tables 4.2.6.8 and 6.1.1.4'
 
_symmetry_cell_setting            Monoclinic
_symmetry_space_group_name_H-M    'C 2/c'
 
loop_
 _symmetry_equiv_pos_as_xyz
 'x, y, z'
 '-x, y, -z+1/2'
 'x+1/2, y+1/2, z'
 '-x+1/2, y+1/2, -z+1/2'
 '-x, -y, -z'
 'x, -y, z-1/2'
 '-x+1/2, -y+1/2, -z'
 'x+1/2, -y+1/2, z-1/2'
 
_cell_length_a                    29.3124(7)
_cell_length_b                    21.0184(5)
_cell_length_c                    18.1676(4)
_cell_angle_alpha                 90.00
_cell_angle_beta                  124.853(2)
_cell_angle_gamma                 90.00
_cell_volume                      9185.2(4)
_cell_formula_units_Z             8
_cell_measurement_temperature     173(2)
_cell_measurement_reflns_used     22397
_cell_measurement_theta_min       2.97
_cell_measurement_theta_max       27.95
 
_exptl_crystal_description        red
_exptl_crystal_colour             irregular
_exptl_crystal_size_max           0.38
_exptl_crystal_size_mid           0.30
_exptl_crystal_size_min           0.25
_exptl_crystal_density_meas       ?
_exptl_crystal_density_diffrn     1.450
_exptl_crystal_density_method     'not measured'
_exptl_crystal_F_000              4120
_exptl_absorpt_coefficient_mu     0.540
_exptl_absorpt_correction_type    multi-scan
_exptl_absorpt_correction_T_min   0.8219
_exptl_absorpt_correction_T_max   1.0000
_exptl_absorpt_process_details    ?
 
_exptl_special_details
;
 ?
;
 
_diffrn_ambient_temperature       173(2)
_diffrn_radiation_wavelength      0.71069
_diffrn_radiation_type            MoK\a
_diffrn_radiation_source          'fine-focus sealed tube'
_diffrn_radiation_monochromator   graphite
_diffrn_measurement_device_type   'Rigaku/ADSC CCD'
_diffrn_measurement_method        'area detector'
_diffrn_detector_area_resol_mean  11.76
_diffrn_standards_number          ?
_diffrn_standards_interval_count  ?
_diffrn_standards_interval_time   ?
_diffrn_standards_decay_%         ?
_diffrn_reflns_number             9302
_diffrn_reflns_av_R_equivalents   0.0570
_diffrn_reflns_av_sigmaI/netI     0.0741
_diffrn_reflns_limit_h_min        -36
_diffrn_reflns_limit_h_max        34
_diffrn_reflns_limit_k_min        -24
_diffrn_reflns_limit_k_max        24
_diffrn_reflns_limit_l_min        -22
_diffrn_reflns_limit_l_max        23
_diffrn_reflns_theta_min          2.97
_diffrn_reflns_theta_max          27.95
_reflns_number_total              9302
_reflns_number_gt                 7083
_reflns_threshold_expression      >2sigma(I)
 
_computing_data_collection        ?
_computing_cell_refinement        ?
_computing_data_reduction         ?
_computing_structure_solution     ?
_computing_structure_refinement   'SHELXL-97 (Sheldrick, 1997)'
_computing_molecular_graphics     ?
_computing_publication_material   ?
 
_refine_special_details
;
 Refinement of F^2^ against ALL reflections.  The weighted R-factor wR and
 goodness of fit S are based on F^2^, conventional R-factors R are based
 on F, with F set to zero for negative F^2^. The threshold expression of
 F^2^ > 2sigma(F^2^) is used only for calculating R-factors(gt) etc. and is
 not relevant to the choice of reflections for refinement.  R-factors based
 on F^2^ are statistically about twice as large as those based on F, and R-
 factors based on ALL data will be even larger.
;
 
_refine_ls_structure_factor_coef  Fsqd
_refine_ls_matrix_type            full
_refine_ls_weighting_scheme       calc
_refine_ls_weighting_details
 'calc w=1/[\s^2^(Fo^2^)+0.0588P^2^+0.5327P] where P=(Fo^2^+2Fc^2^)/3'
_atom_sites_solution_primary      direct
_atom_sites_solution_secondary    difmap
_atom_sites_solution_hydrogens    geom
_refine_ls_hydrogen_treatment     mixed
_refine_ls_extinction_method      none
_refine_ls_extinction_coef        ?
_refine_ls_number_reflns          9302
_refine_ls_number_parameters      590
_refine_ls_number_restraints      0
_refine_ls_R_factor_all           0.0622
_refine_ls_R_factor_gt            0.0423
_refine_ls_wR_factor_ref          0.1200
_refine_ls_wR_factor_gt           0.1104
_refine_ls_goodness_of_fit_ref    1.031
_refine_ls_restrained_S_all       1.031
_refine_ls_shift/su_max           0.009
_refine_ls_shift/su_mean          0.003
 
loop_
 _atom_site_label
 _atom_site_type_symbol
 _atom_site_fract_x
 _atom_site_fract_y
 _atom_site_fract_z
 _atom_site_U_iso_or_equiv
 _atom_site_adp_type
 _atom_site_occupancy
 _atom_site_symmetry_multiplicity
 _atom_site_calc_flag
 _atom_site_refinement_flags
 _atom_site_disorder_assembly
 _atom_site_disorder_group
Rh1 Rh 0.125723(10) 0.258476(11) 0.102685(16) 0.02031(9) Uani 1 1 d . . .
P1 P 0.19000(3) 0.33334(4) 0.16002(5) 0.02000(17) Uani 1 1 d . . .
P2 P 0.18365(3) 0.18407(4) 0.20106(5) 0.01890(17) Uani 1 1 d . . .
P3 P 0.0000 0.13495(7) -0.2500 0.0373(3) Uani 1 2 d S . .
P4A P 0.0000 0.32930(19) 0.2500 0.0506(11) Uiso 0.50 2 d SP . .
F1 F -0.03348(13) 0.08242(17) -0.2403(3) 0.0953(12) Uani 1 1 d . . .
F2 F -0.04826(13) 0.1367(2) -0.3536(2) 0.1012(13) Uani 1 1 d . . .
F3 F -0.03188(12) 0.18726(18) -0.2345(3) 0.1141(15) Uani 1 1 d . . .
F4 F -0.0383(2) 0.3831(3) 0.1870(4) 0.164(2) Uiso 1 1 d . . .
F5A F -0.0330(5) 0.3523(6) 0.3083(8) 0.153(4) Uiso 0.50 1 d P . .
F5B F -0.0139(5) 0.2982(7) 0.2985(8) 0.158(4) Uiso 0.50 1 d P . .
F6A F -0.0211(3) 0.2730(3) 0.1757(5) 0.0758(17) Uiso 0.50 1 d P . .
O1 O -0.0164(3) 0.3582(3) 0.0335(4) 0.063(2) Uani 0.532(9) 1 d P . .
H1 H -0.0144 0.3450 0.0789 0.094 Uiso 1 1 calc R . .
N1 N 0.06029(12) 0.18521(16) 0.0412(2) 0.0304(7) Uani 1 1 d . . .
N2 N 0.06288(15) 0.32213(18) 0.0047(2) 0.0444(9) Uani 1 1 d . . .
C1 C 0.16954(13) 0.41271(15) 0.1064(2) 0.0242(7) Uani 1 1 d . . .
C2 C 0.14788(16) 0.45943(18) 0.1317(2) 0.0357(8) Uani 1 1 d . . .
H2 H 0.1427 0.4506 0.1778 0.043 Uiso 1 1 calc R . .
C3 C 0.1335(2) 0.51884(19) 0.0914(3) 0.0491(11) Uani 1 1 d . . .
H3 H 0.1183 0.5500 0.1095 0.059 Uiso 1 1 calc R . .
C4 C 0.14121(18) 0.53276(19) 0.0252(3) 0.0467(10) Uani 1 1 d . . .
H4 H 0.1324 0.5738 -0.0015 0.056 Uiso 1 1 calc R . .
C5 C 0.16188(18) 0.4865(2) -0.0019(3) 0.0450(10) Uani 1 1 d . . .
H5 H 0.1666 0.4956 -0.0483 0.054 Uiso 1 1 calc R . .
C6 C 0.17563(16) 0.42776(18) 0.0371(2) 0.0360(8) Uani 1 1 d . . .
H6 H 0.1896 0.3965 0.0170 0.043 Uiso 1 1 calc R . .
C7 C 0.25012(13) 0.31899(16) 0.1563(2) 0.0257(7) Uani 1 1 d . . .
C8 C 0.29506(14) 0.36113(18) 0.1924(2) 0.0329(8) Uani 1 1 d . . .
H8 H 0.2946 0.3997 0.2192 0.039 Uiso 1 1 calc R . .
C9 C 0.34015(15) 0.3469(2) 0.1893(3) 0.0433(10) Uani 1 1 d . . .
H9 H 0.3709 0.3753 0.2156 0.052 Uiso 1 1 calc R . .
C10 C 0.34072(16) 0.2917(2) 0.1481(3) 0.0434(10) Uani 1 1 d . . .
H10 H 0.3720 0.2816 0.1472 0.052 Uiso 1 1 calc R . .
C11 C 0.29568(17) 0.25155(19) 0.1087(3) 0.0393(9) Uani 1 1 d . . .
H11 H 0.2951 0.2144 0.0784 0.047 Uiso 1 1 calc R . .
C12 C 0.25070(15) 0.26542(17) 0.1130(2) 0.0290(7) Uani 1 1 d . . .
H12 H 0.2198 0.2373 0.0855 0.035 Uiso 1 1 calc R . .
C13 C 0.21587(14) 0.35243(15) 0.2762(2) 0.0252(7) Uani 1 1 d . . .
C14 C 0.27117(16) 0.36047(16) 0.3458(2) 0.0331(8) Uani 1 1 d . . .
H14 H 0.2991 0.3566 0.3348 0.040 Uiso 1 1 calc R . .
C15 C 0.28613(19) 0.37412(18) 0.4317(2) 0.0427(10) Uani 1 1 d . . .
H15 H 0.3242 0.3794 0.4793 0.051 Uiso 1 1 calc R . .
C16 C 0.2462(2) 0.37999(18) 0.4480(3) 0.0522(13) Uani 1 1 d . . .
H16 H 0.2568 0.3895 0.5069 0.063 Uiso 1 1 calc R . .
C17 C 0.1899(2) 0.37213(18) 0.3789(3) 0.0446(11) Uani 1 1 d . . .
H17 H 0.1623 0.3765 0.3903 0.053 Uiso 1 1 calc R . .
C18 C 0.17527(16) 0.35786(16) 0.2935(2) 0.0317(8) Uani 1 1 d . . .
H18 H 0.1372 0.3517 0.2463 0.038 Uiso 1 1 calc R . .
C19 C 0.25277(13) 0.19786(14) 0.3052(2) 0.0224(6) Uani 1 1 d . . .
C20 C 0.30094(14) 0.19693(16) 0.3065(2) 0.0284(7) Uani 1 1 d . . .
H20 H 0.2980 0.1886 0.2525 0.034 Uiso 1 1 calc R . .
C21 C 0.35254(15) 0.20783(19) 0.3845(2) 0.0369(8) Uani 1 1 d . . .
H21 H 0.3848 0.2063 0.3840 0.044 Uiso 1 1 calc R . .
C22 C 0.35769(16) 0.22103(18) 0.4640(2) 0.0375(9) Uani 1 1 d . . .
H22 H 0.3932 0.2288 0.5177 0.045 Uiso 1 1 calc R . .
C23 C 0.31093(16) 0.22269(17) 0.4639(2) 0.0341(8) Uani 1 1 d . . .
H23 H 0.3142 0.2319 0.5180 0.041 Uiso 1 1 calc R . .
C24 C 0.25851(15) 0.21109(16) 0.3855(2) 0.0275(7) Uani 1 1 d . . .
H24 H 0.2265 0.2122 0.3867 0.033 Uiso 1 1 calc R . .
C25 C 0.19805(13) 0.12272(14) 0.1451(2) 0.0218(6) Uani 1 1 d . . .
C26 C 0.23747(14) 0.07412(16) 0.1898(2) 0.0309(8) Uani 1 1 d . . .
H26 H 0.2581 0.0710 0.2533 0.037 Uiso 1 1 calc R . .
C27 C 0.24651(16) 0.03087(17) 0.1424(3) 0.0367(8) Uani 1 1 d . . .
H27 H 0.2730 -0.0022 0.1733 0.044 Uiso 1 1 calc R . .
C28 C 0.21737(17) 0.03522(18) 0.0500(3) 0.0395(9) Uani 1 1 d . . .
H28 H 0.2245 0.0059 0.0180 0.047 Uiso 1 1 calc R . .
C29 C 0.17812(16) 0.08205(16) 0.0046(2) 0.0324(8) Uani 1 1 d . . .
H29 H 0.1576 0.0844 -0.0589 0.039 Uiso 1 1 calc R . .
C30 C 0.16835(14) 0.12596(15) 0.0513(2) 0.0250(7) Uani 1 1 d . . .
H30 H 0.1414 0.1584 0.0195 0.030 Uiso 1 1 calc R . .
C31 C 0.15027(14) 0.14135(16) 0.2468(2) 0.0259(7) Uani 1 1 d . . .
C32 C 0.15488(17) 0.07631(18) 0.2627(3) 0.0378(9) Uani 1 1 d . . .
H32 H 0.1745 0.0509 0.2463 0.045 Uiso 1 1 calc R . .
C33 C 0.1310(2) 0.0479(2) 0.3024(3) 0.0503(11) Uani 1 1 d . . .
H33 H 0.1345 0.0033 0.3130 0.060 Uiso 1 1 calc R . .
C34 C 0.10257(19) 0.0840(2) 0.3262(3) 0.0510(12) Uani 1 1 d . . .
H34 H 0.0864 0.0645 0.3532 0.061 Uiso 1 1 calc R . .
C35 C 0.09736(16) 0.1484(2) 0.3110(3) 0.0433(10) Uani 1 1 d . . .
H35 H 0.0778 0.1733 0.3281 0.052 Uiso 1 1 calc R . .
C36 C 0.12067(14) 0.17736(18) 0.2707(2) 0.0332(8) Uani 1 1 d . . .
H36 H 0.1164 0.2219 0.2595 0.040 Uiso 1 1 calc R . .
C37 C 0.00864(15) 0.19462(19) 0.0371(3) 0.0381(9) Uani 1 1 d . . .
H37A H -0.0148 0.2272 -0.0087 0.046 Uiso 1 1 calc R . .
H37B H 0.0184 0.2105 0.0958 0.046 Uiso 1 1 calc R . .
C38 C -0.02391(14) 0.13348(17) 0.0143(3) 0.0319(8) Uani 1 1 d . . .
C39 C -0.00784(19) 0.0871(2) 0.0796(3) 0.0514(11) Uani 1 1 d . . .
H39 H 0.0227 0.0950 0.1396 0.062 Uiso 1 1 calc R . .
C40 C -0.0359(2) 0.0294(2) 0.0579(3) 0.0522(11) Uani 1 1 d . . .
H40 H -0.0250 -0.0016 0.1032 0.063 Uiso 1 1 calc R . .
C41 C -0.07947(17) 0.0171(2) -0.0290(3) 0.0506(11) Uani 1 1 d . . .
H41 H -0.0989 -0.0222 -0.0443 0.061 Uiso 1 1 calc R . .
C42 C -0.0946(2) 0.0628(2) -0.0936(4) 0.0678(15) Uani 1 1 d . . .
H42 H -0.1244 0.0545 -0.1540 0.081 Uiso 1 1 calc R . .
C43 C -0.06721(18) 0.1200(2) -0.0720(3) 0.0535(12) Uani 1 1 d . . .
H43 H -0.0785 0.1508 -0.1177 0.064 Uiso 1 1 calc R . .
C44 C 0.04193(18) 0.3155(2) -0.0906(3) 0.0542(11) Uani 1 1 d . . .
H44A H 0.0285 0.2715 -0.1106 0.065 Uiso 1 1 calc R . .
H44B H 0.0727 0.3234 -0.0973 0.065 Uiso 1 1 calc R . .
C45 C -0.00480(18) 0.3616(2) -0.1489(3) 0.0511(11) Uani 1 1 d . . .
C46 C -0.05918(17) 0.3418(2) -0.2037(3) 0.0443(10) Uani 1 1 d . . .
H46 H -0.0676 0.2978 -0.2065 0.053 Uiso 1 1 calc R . .
C47 C -0.10201(18) 0.3851(3) -0.2551(3) 0.0539(12) Uani 1 1 d . . .
H47 H -0.1394 0.3706 -0.2927 0.065 Uiso 1 1 calc R . .
C48 C -0.0903(2) 0.4484(3) -0.2514(3) 0.0625(14) Uani 1 1 d . . .
H48 H -0.1196 0.4780 -0.2860 0.075 Uiso 1 1 calc R . .
C49 C -0.0370(2) 0.4692(3) -0.1986(5) 0.114(3) Uani 1 1 d . . .
H49 H -0.0289 0.5132 -0.1969 0.137 Uiso 1 1 calc R . .
C50 C 0.0058(2) 0.4258(3) -0.1471(5) 0.112(3) Uani 1 1 d . . .
H50 H 0.0430 0.4406 -0.1099 0.135 Uiso 1 1 calc R . .
C51 C -0.0030(4) 0.4220(5) 0.0439(9) 0.079(4) Uani 0.532(9) 1 d P . .
P4B P -0.00913(18) 0.3313(2) 0.2697(3) 0.0334(8) Uiso 0.25 1 d P . .
F6B F -0.0640(3) 0.2977(4) 0.1970(6) 0.111(2) Uiso 0.50 1 d P . .
H2N H 0.073(2) 0.149(3) 0.065(4) 0.066(17) Uiso 1 1 d . . .
H3N H 0.030(2) 0.322(2) 0.009(3) 0.059(14) Uiso 1 1 d . . .
H4N H 0.074(2) 0.353(2) 0.022(3) 0.052(15) Uiso 1 1 d . . .
H1N H 0.0499(16) 0.1849(19) -0.013(3) 0.032(11) Uiso 1 1 d . . .
 
loop_
 _atom_site_aniso_label
 _atom_site_aniso_U_11
 _atom_site_aniso_U_22
 _atom_site_aniso_U_33
 _atom_site_aniso_U_23
 _atom_site_aniso_U_13
 _atom_site_aniso_U_12
Rh1 0.02037(13) 0.01430(14) 0.02008(14) -0.00034(10) 0.00791(11) -0.00315(9)
P1 0.0242(4) 0.0157(4) 0.0171(4) -0.0006(3) 0.0101(4) -0.0051(3)
P2 0.0241(4) 0.0145(4) 0.0171(4) -0.0002(3) 0.0112(3) -0.0026(3)
P3 0.0227(6) 0.0339(8) 0.0469(9) 0.000 0.0149(6) 0.000
F1 0.0592(18) 0.081(2) 0.150(3) 0.040(2) 0.062(2) -0.0019(16)
F2 0.060(2) 0.157(4) 0.0512(19) 0.010(2) 0.0112(16) -0.013(2)
F3 0.0477(17) 0.096(3) 0.164(4) -0.069(3) 0.040(2) 0.0031(17)
O1 0.072(5) 0.067(5) 0.067(5) -0.003(3) 0.050(4) -0.005(3)
N1 0.0245(15) 0.0265(18) 0.0318(18) -0.0043(14) 0.0112(14) -0.0078(13)
N2 0.0337(19) 0.0204(19) 0.040(2) 0.0014(15) -0.0018(16) -0.0055(14)
C1 0.0275(16) 0.0214(17) 0.0184(15) 0.0002(13) 0.0100(14) -0.0065(13)
C2 0.053(2) 0.026(2) 0.0263(18) 0.0008(15) 0.0213(18) 0.0008(17)
C3 0.079(3) 0.023(2) 0.038(2) 0.0024(17) 0.029(2) 0.011(2)
C4 0.067(3) 0.022(2) 0.042(2) 0.0091(17) 0.026(2) -0.0035(19)
C5 0.060(3) 0.040(2) 0.038(2) 0.0120(18) 0.029(2) -0.003(2)
C6 0.048(2) 0.032(2) 0.0300(19) 0.0073(16) 0.0238(18) 0.0034(17)
C7 0.0289(16) 0.0240(18) 0.0231(16) 0.0071(13) 0.0142(15) -0.0023(13)
C8 0.0337(19) 0.032(2) 0.0296(19) 0.0027(15) 0.0158(17) -0.0071(15)
C9 0.0297(19) 0.058(3) 0.038(2) 0.013(2) 0.0171(18) -0.0077(18)
C10 0.035(2) 0.061(3) 0.042(2) 0.019(2) 0.0266(19) 0.0130(19)
C11 0.045(2) 0.042(2) 0.036(2) 0.0080(17) 0.026(2) 0.0089(18)
C12 0.0340(18) 0.0308(19) 0.0279(18) 0.0045(15) 0.0209(16) -0.0019(15)
C13 0.0387(19) 0.0137(16) 0.0213(17) 0.0011(13) 0.0161(16) -0.0056(13)
C14 0.047(2) 0.0199(18) 0.0219(17) 0.0002(14) 0.0131(17) -0.0057(15)
C15 0.064(3) 0.024(2) 0.0202(18) -0.0004(15) 0.012(2) -0.0098(18)
C16 0.107(4) 0.022(2) 0.022(2) -0.0051(15) 0.034(3) -0.018(2)
C17 0.086(3) 0.024(2) 0.046(2) -0.0030(17) 0.051(3) -0.009(2)
C18 0.051(2) 0.0202(18) 0.0299(19) -0.0007(14) 0.0264(18) -0.0075(15)
C19 0.0307(17) 0.0144(16) 0.0169(15) 0.0022(12) 0.0106(14) -0.0027(12)
C20 0.0295(17) 0.0273(19) 0.0250(17) 0.0011(14) 0.0136(15) -0.0009(14)
C21 0.0308(18) 0.035(2) 0.033(2) 0.0003(17) 0.0111(17) -0.0024(16)
C22 0.0334(19) 0.034(2) 0.0214(18) 0.0034(15) 0.0017(16) -0.0038(16)
C23 0.048(2) 0.0249(19) 0.0155(16) 0.0025(14) 0.0101(17) -0.0075(16)
C24 0.0389(19) 0.0208(17) 0.0219(17) 0.0029(13) 0.0169(16) -0.0024(14)
C25 0.0276(16) 0.0146(16) 0.0214(16) -0.0015(12) 0.0130(14) -0.0051(12)
C26 0.0356(19) 0.0230(18) 0.0280(18) 0.0015(14) 0.0146(17) 0.0032(14)
C27 0.044(2) 0.0208(19) 0.042(2) 0.0002(16) 0.0225(19) 0.0062(16)
C28 0.063(3) 0.025(2) 0.046(2) -0.0048(17) 0.041(2) 0.0034(18)
C29 0.054(2) 0.0225(18) 0.0258(18) -0.0039(14) 0.0259(18) -0.0054(16)
C30 0.0335(17) 0.0191(17) 0.0235(17) 0.0002(13) 0.0170(15) -0.0027(13)
C31 0.0314(17) 0.0261(18) 0.0219(16) -0.0023(13) 0.0162(15) -0.0087(14)
C32 0.057(2) 0.029(2) 0.038(2) -0.0016(16) 0.033(2) -0.0098(17)
C33 0.080(3) 0.032(2) 0.047(2) 0.0049(19) 0.041(3) -0.016(2)
C34 0.061(3) 0.064(3) 0.039(2) -0.001(2) 0.035(2) -0.026(2)
C35 0.044(2) 0.062(3) 0.032(2) -0.0070(19) 0.0264(19) -0.013(2)
C36 0.0368(19) 0.033(2) 0.0298(19) -0.0034(15) 0.0190(17) -0.0049(16)
C37 0.0306(18) 0.033(2) 0.048(2) -0.0071(18) 0.0217(19) -0.0035(16)
C38 0.0275(17) 0.029(2) 0.041(2) -0.0039(16) 0.0211(17) -0.0022(14)
C39 0.057(3) 0.053(3) 0.037(2) -0.002(2) 0.022(2) -0.016(2)
C40 0.074(3) 0.043(3) 0.060(3) 0.005(2) 0.050(3) -0.009(2)
C41 0.039(2) 0.035(2) 0.080(3) -0.009(2) 0.035(2) -0.0102(18)
C42 0.046(3) 0.039(3) 0.062(3) -0.006(2) -0.003(2) -0.010(2)
C43 0.046(2) 0.032(2) 0.046(3) 0.0024(19) 0.005(2) -0.0022(19)
C44 0.048(3) 0.048(3) 0.043(2) 0.013(2) 0.012(2) 0.005(2)
C45 0.046(2) 0.046(3) 0.042(2) 0.019(2) 0.013(2) -0.003(2)
C46 0.046(2) 0.049(3) 0.035(2) -0.0015(19) 0.021(2) -0.0074(19)
C47 0.037(2) 0.075(4) 0.042(2) 0.000(2) 0.018(2) 0.004(2)
C48 0.051(3) 0.078(4) 0.049(3) 0.030(3) 0.024(2) 0.023(3)
C49 0.064(4) 0.059(4) 0.156(7) 0.063(4) 0.025(4) 0.001(3)
C50 0.044(3) 0.060(4) 0.144(6) 0.055(4) 0.001(3) -0.010(3)
C51 0.072(7) 0.050(6) 0.126(11) -0.002(6) 0.063(8) 0.009(5)
 
_geom_special_details
;
 All esds (except the esd in the dihedral angle between two l.s. planes)
 are estimated using the full covariance matrix.  The cell esds are taken
 into account individually in the estimation of esds in distances, angles
 and torsion angles; correlations between esds in cell parameters are only
 used when they are defined by crystal symmetry.  An approximate (isotropic)
 treatment of cell esds is used for estimating esds involving l.s. planes.
;
 
loop_
 _geom_bond_atom_site_label_1
 _geom_bond_atom_site_label_2
 _geom_bond_distance
 _geom_bond_site_symmetry_2
 _geom_bond_publ_flag
Rh1 N2 2.146(3) . ?
Rh1 N1 2.202(3) . ?
Rh1 P1 2.2063(8) . ?
Rh1 P2 2.2483(8) . ?
P1 C7 1.827(3) . ?
P1 C13 1.833(3) . ?
P1 C1 1.850(3) . ?
P2 C25 1.835(3) . ?
P2 C31 1.839(3) . ?
P2 C19 1.841(3) . ?
P3 F1 1.553(3) 2_554 ?
P3 F1 1.553(3) . ?
P3 F3 1.569(3) 2_554 ?
P3 F3 1.569(3) . ?
P3 F2 1.581(3) 2_554 ?
P3 F2 1.581(3) . ?
P4A P4B 0.558(5) 2 ?
P4A P4B 0.558(5) . ?
P4A F5B 1.334(13) 2 ?
P4A F5B 1.334(13) . ?
P4A F4 1.543(7) 2 ?
P4A F4 1.543(7) . ?
P4A F6A 1.627(8) . ?
P4A F6A 1.627(8) 2 ?
P4A F6B 1.680(9) . ?
P4A F6B 1.680(9) 2 ?
P4A F5A 1.861(12) . ?
P4A F5A 1.861(12) 2 ?
F4 P4B 1.578(7) 2 ?
F4 P4B 1.646(7) . ?
F5A P4B 1.319(13) . ?
F5A F5B 1.326(15) . ?
F5B P4B 0.928(13) . ?
F5B F6A 1.001(13) 2 ?
F5B F6B 1.570(13) . ?
F5B P4B 1.852(14) 2 ?
F6A F5B 1.001(13) 2 ?
F6A P4B 1.504(9) 2 ?
F6A F6B 1.597(10) . ?
F6A P4B 1.962(8) . ?
O1 C51 1.380(12) . ?
O1 H1 0.8400 . ?
N1 C37 1.486(4) . ?
N1 H2N 0.86(6) . ?
N1 H1N 0.85(4) . ?
N2 C44 1.475(6) . ?
N2 H3N 1.01(5) . ?
N2 H4N 0.71(5) . ?
C1 C2 1.383(5) . ?
C1 C6 1.405(4) . ?
C2 C3 1.386(5) . ?
C2 H2 0.9500 . ?
C3 C4 1.376(6) . ?
C3 H3 0.9500 . ?
C4 C5 1.376(6) . ?
C4 H4 0.9500 . ?
C5 C6 1.365(5) . ?
C5 H5 0.9500 . ?
C6 H6 0.9500 . ?
C7 C12 1.379(5) . ?
C7 C8 1.401(5) . ?
C8 C9 1.387(5) . ?
C8 H8 0.9500 . ?
C9 C10 1.388(6) . ?
C9 H9 0.9500 . ?
C10 C11 1.373(6) . ?
C10 H10 0.9500 . ?
C11 C12 1.396(5) . ?
C11 H11 0.9500 . ?
C12 H12 0.9500 . ?
C13 C14 1.383(5) . ?
C13 C18 1.399(5) . ?
C14 C15 1.388(5) . ?
C14 H14 0.9500 . ?
C15 C16 1.366(6) . ?
C15 H15 0.9500 . ?
C16 C17 1.399(6) . ?
C16 H16 0.9500 . ?
C17 C18 1.384(5) . ?
C17 H17 0.9500 . ?
C18 H18 0.9500 . ?
C19 C24 1.397(4) . ?
C19 C20 1.399(4) . ?
C20 C21 1.378(5) . ?
C20 H20 0.9500 . ?
C21 C22 1.391(5) . ?
C21 H21 0.9500 . ?
C22 C23 1.371(5) . ?
C22 H22 0.9500 . ?
C23 C24 1.396(5) . ?
C23 H23 0.9500 . ?
C24 H24 0.9500 . ?
C25 C26 1.402(5) . ?
C25 C30 1.404(4) . ?
C26 C27 1.379(5) . ?
C26 H26 0.9500 . ?
C27 C28 1.384(5) . ?
C27 H27 0.9500 . ?
C28 C29 1.374(5) . ?
C28 H28 0.9500 . ?
C29 C30 1.389(4) . ?
C29 H29 0.9500 . ?
C30 H30 0.9500 . ?
C31 C32 1.388(5) . ?
C31 C36 1.395(5) . ?
C32 C33 1.395(5) . ?
C32 H32 0.9500 . ?
C33 C34 1.367(6) . ?
C33 H33 0.9500 . ?
C34 C35 1.372(6) . ?
C34 H34 0.9500 . ?
C35 C36 1.396(5) . ?
C35 H35 0.9500 . ?
C36 H36 0.9500 . ?
C37 C38 1.510(5) . ?
C37 H37A 0.9900 . ?
C37 H37B 0.9900 . ?
C38 C43 1.370(6) . ?
C38 C39 1.392(6) . ?
C39 C40 1.392(6) . ?
C39 H39 0.9500 . ?
C40 C41 1.372(6) . ?
C40 H40 0.9500 . ?
C41 C42 1.379(7) . ?
C41 H41 0.9500 . ?
C42 C43 1.374(6) . ?
C42 H42 0.9500 . ?
C43 H43 0.9500 . ?
C44 C45 1.508(6) . ?
C44 H44A 0.9900 . ?
C44 H44B 0.9900 . ?
C45 C46 1.375(6) . ?
C45 C50 1.381(7) . ?
C46 C47 1.391(6) . ?
C46 H46 0.9500 . ?
C47 C48 1.367(7) . ?
C47 H47 0.9500 . ?
C48 C49 1.357(7) . ?
C48 H48 0.9500 . ?
C49 C50 1.393(8) . ?
C49 H49 0.9500 . ?
C50 H50 0.9500 . ?
P4B P4B 1.112(11) 2 ?
P4B F6A 1.504(9) 2 ?
P4B F6B 1.549(9) . ?
P4B F4 1.578(7) 2 ?
P4B F5B 1.852(14) 2 ?
P4B F6B 1.993(10) 2 ?
F6B P4B 1.993(10) 2 ?
 
loop_
 _geom_angle_atom_site_label_1
 _geom_angle_atom_site_label_2
 _geom_angle_atom_site_label_3
 _geom_angle
 _geom_angle_site_symmetry_1
 _geom_angle_site_symmetry_3
 _geom_angle_publ_flag
N2 Rh1 N1 85.95(14) . . ?
N2 Rh1 P1 92.50(10) . . ?
N1 Rh1 P1 178.17(10) . . ?
N2 Rh1 P2 173.47(11) . . ?
N1 Rh1 P2 87.70(10) . . ?
P1 Rh1 P2 93.88(3) . . ?
C7 P1 C13 107.80(15) . . ?
C7 P1 C1 99.12(14) . . ?
C13 P1 C1 101.84(14) . . ?
C7 P1 Rh1 116.51(11) . . ?
C13 P1 Rh1 112.30(10) . . ?
C1 P1 Rh1 117.52(10) . . ?
C25 P2 C31 104.93(14) . . ?
C25 P2 C19 102.35(14) . . ?
C31 P2 C19 99.76(14) . . ?
C25 P2 Rh1 110.90(10) . . ?
C31 P2 Rh1 110.10(11) . . ?
C19 P2 Rh1 126.53(10) . . ?
F1 P3 F1 89.4(3) 2_554 . ?
F1 P3 F3 89.9(2) 2_554 2_554 ?
F1 P3 F3 176.9(2) . 2_554 ?
F1 P3 F3 176.9(2) 2_554 . ?
F1 P3 F3 89.9(2) . . ?
F3 P3 F3 91.0(3) 2_554 . ?
F1 P3 F2 87.6(2) 2_554 2_554 ?
F1 P3 F2 94.3(2) . 2_554 ?
F3 P3 F2 88.7(2) 2_554 2_554 ?
F3 P3 F2 89.4(2) . 2_554 ?
F1 P3 F2 94.3(2) 2_554 . ?
F1 P3 F2 87.6(2) . . ?
F3 P3 F2 89.4(2) 2_554 . ?
F3 P3 F2 88.7(2) . . ?
F2 P3 F2 177.3(3) 2_554 . ?
P4B P4A P4B 171.5(15) 2 . ?
P4B P4A F5B 34.2(9) 2 2 ?
P4B P4A F5B 154.1(11) . 2 ?
P4B P4A F5B 154.1(11) 2 . ?
P4B P4A F5B 34.2(9) . . ?
F5B P4A F5B 121.2(13) 2 . ?
P4B P4A F4 90.5(7) 2 2 ?
P4B P4A F4 83.3(6) . 2 ?
F5B P4A F4 118.8(6) 2 2 ?
F5B P4A F4 103.7(6) . 2 ?
P4B P4A F4 83.3(6) 2 . ?
P4B P4A F4 90.5(7) . . ?
F5B P4A F4 103.7(6) 2 . ?
F5B P4A F4 118.8(6) . . ?
F4 P4A F4 85.7(5) 2 . ?
P4B P4A F6A 67.4(7) 2 . ?
P4B P4A F6A 119.4(7) . . ?
F5B P4A F6A 37.9(6) 2 . ?
F5B P4A F6A 94.4(7) . . ?
F4 P4A F6A 156.7(3) 2 . ?
F4 P4A F6A 98.5(3) . . ?
P4B P4A F6A 119.4(7) 2 2 ?
P4B P4A F6A 67.4(7) . 2 ?
F5B P4A F6A 94.4(7) 2 2 ?
F5B P4A F6A 37.9(6) . 2 ?
F4 P4A F6A 98.5(3) 2 2 ?
F4 P4A F6A 156.7(3) . 2 ?
F6A P4A F6A 86.7(5) . 2 ?
P4B P4A F6B 116.7(6) 2 . ?
P4B P4A F6B 67.0(6) . . ?
F5B P4A F6B 95.1(7) 2 . ?
F5B P4A F6B 61.5(6) . . ?
F4 P4A F6B 144.7(4) 2 . ?
F4 P4A F6B 76.3(4) . . ?
F6A P4A F6B 57.7(4) . . ?
F6A P4A F6B 87.7(4) 2 . ?
P4B P4A F6B 67.0(6) 2 2 ?
P4B P4A F6B 116.7(6) . 2 ?
F5B P4A F6B 61.5(6) 2 2 ?
F5B P4A F6B 95.1(7) . 2 ?
F4 P4A F6B 76.3(4) 2 2 ?
F4 P4A F6B 144.7(4) . 2 ?
F6A P4A F6B 87.7(4) . 2 ?
F6A P4A F6B 57.7(4) 2 2 ?
F6B P4A F6B 133.4(7) . 2 ?
P4B P4A F5A 160.5(9) 2 . ?
P4B P4A F5A 11.2(8) . . ?
F5B P4A F5A 163.2(9) 2 . ?
F5B P4A F5A 45.4(6) . . ?
F4 P4A F5A 77.5(4) 2 . ?
F4 P4A F5A 80.6(4) . . ?
F6A P4A F5A 125.8(5) . . ?
F6A P4A F5A 78.0(4) 2 . ?
F6B P4A F5A 69.9(4) . . ?
F6B P4A F5A 123.4(4) 2 . ?
P4B P4A F5A 11.2(8) 2 2 ?
P4B P4A F5A 160.5(9) . 2 ?
F5B P4A F5A 45.4(6) 2 2 ?
F5B P4A F5A 163.2(9) . 2 ?
F4 P4A F5A 80.6(4) 2 2 ?
F4 P4A F5A 77.5(4) . 2 ?
F6A P4A F5A 78.0(4) . 2 ?
F6A P4A F5A 125.8(5) 2 2 ?
F6B P4A F5A 123.4(4) . 2 ?
F6B P4A F5A 69.9(4) 2 2 ?
F5A P4A F5A 149.9(8) . 2 ?
P4A F4 P4B 20.5(2) . 2 ?
P4A F4 P4B 19.8(2) . . ?
P4B F4 P4B 40.3(4) 2 . ?
P4B F5A F5B 41.1(6) . . ?
P4B F5A P4A 4.7(3) . . ?
F5B F5A P4A 45.8(7) . . ?
P4B F5B F6A 102.5(13) . 2 ?
P4B F5B F5A 69.1(11) . . ?
F6A F5B F5A 142.3(15) 2 . ?
P4B F5B P4A 19.7(5) . . ?
F6A F5B P4A 87.1(10) 2 . ?
F5A F5B P4A 88.8(11) . . ?
P4B F5B F6B 71.5(9) . . ?
F6A F5B F6B 124.5(13) 2 . ?
F5A F5B F6B 88.8(10) . . ?
P4A F5B F6B 70.1(7) . . ?
P4B F5B P4B 27.3(6) . 2 ?
F6A F5B P4B 81.0(9) 2 2 ?
F5A F5B P4B 96.4(9) . 2 ?
P4A F5B P4B 7.6(3) . 2 ?
F6B F5B P4B 70.7(6) . 2 ?
F5B F6A P4B 37.0(8) 2 2 ?
F5B F6A F6B 117.0(10) 2 . ?
P4B F6A F6B 79.9(5) 2 . ?
F5B F6A P4A 55.0(8) 2 . ?
P4B F6A P4A 20.0(2) 2 . ?
F6B F6A P4A 62.8(4) . . ?
F5B F6A P4B 68.8(9) 2 . ?
P4B F6A P4B 34.3(4) 2 . ?
F6B F6A P4B 50.3(4) . . ?
P4A F6A P4B 14.33(19) . . ?
C51 O1 H1 109.5 . . ?
C37 N1 Rh1 120.0(2) . . ?
C37 N1 H2N 107(3) . . ?
Rh1 N1 H2N 111(3) . . ?
C37 N1 H1N 105(3) . . ?
Rh1 N1 H1N 103(3) . . ?
H2N N1 H1N 110(4) . . ?
C44 N2 Rh1 120.0(3) . . ?
C44 N2 H3N 108(3) . . ?
Rh1 N2 H3N 110(3) . . ?
C44 N2 H4N 113(4) . . ?
Rh1 N2 H4N 104(4) . . ?
H3N N2 H4N 99(5) . . ?
C2 C1 C6 117.1(3) . . ?
C2 C1 P1 122.5(2) . . ?
C6 C1 P1 120.4(3) . . ?
C1 C2 C3 121.5(3) . . ?
C1 C2 H2 119.2 . . ?
C3 C2 H2 119.2 . . ?
C4 C3 C2 120.1(4) . . ?
C4 C3 H3 120.0 . . ?
C2 C3 H3 120.0 . . ?
C5 C4 C3 119.2(4) . . ?
C5 C4 H4 120.4 . . ?
C3 C4 H4 120.4 . . ?
C6 C5 C4 120.9(4) . . ?
C6 C5 H5 119.6 . . ?
C4 C5 H5 119.6 . . ?
C5 C6 C1 121.2(4) . . ?
C5 C6 H6 119.4 . . ?
C1 C6 H6 119.4 . . ?
C12 C7 C8 117.9(3) . . ?
C12 C7 P1 118.8(2) . . ?
C8 C7 P1 123.2(3) . . ?
C9 C8 C7 120.5(4) . . ?
C9 C8 H8 119.7 . . ?
C7 C8 H8 119.7 . . ?
C10 C9 C8 120.5(4) . . ?
C10 C9 H9 119.8 . . ?
C8 C9 H9 119.8 . . ?
C11 C10 C9 119.4(4) . . ?
C11 C10 H10 120.3 . . ?
C9 C10 H10 120.3 . . ?
C10 C11 C12 120.0(4) . . ?
C10 C11 H11 120.0 . . ?
C12 C11 H11 120.0 . . ?
C7 C12 C11 121.5(3) . . ?
C7 C12 H12 119.3 . . ?
C11 C12 H12 119.3 . . ?
C14 C13 C18 119.1(3) . . ?
C14 C13 P1 125.3(3) . . ?
C18 C13 P1 115.6(3) . . ?
C13 C14 C15 120.4(4) . . ?
C13 C14 H14 119.8 . . ?
C15 C14 H14 119.8 . . ?
C16 C15 C14 120.1(4) . . ?
C16 C15 H15 119.9 . . ?
C14 C15 H15 119.9 . . ?
C15 C16 C17 120.8(3) . . ?
C15 C16 H16 119.6 . . ?
C17 C16 H16 119.6 . . ?
C18 C17 C16 118.8(4) . . ?
C18 C17 H17 120.6 . . ?
C16 C17 H17 120.6 . . ?
C17 C18 C13 120.7(4) . . ?
C17 C18 H18 119.7 . . ?
C13 C18 H18 119.6 . . ?
C24 C19 C20 117.9(3) . . ?
C24 C19 P2 120.7(2) . . ?
C20 C19 P2 121.5(2) . . ?
C21 C20 C19 121.2(3) . . ?
C21 C20 H20 119.4 . . ?
C19 C20 H20 119.4 . . ?
C20 C21 C22 120.4(3) . . ?
C20 C21 H21 119.8 . . ?
C22 C21 H21 119.8 . . ?
C23 C22 C21 119.3(3) . . ?
C23 C22 H22 120.4 . . ?
C21 C22 H22 120.4 . . ?
C22 C23 C24 120.9(3) . . ?
C22 C23 H23 119.6 . . ?
C24 C23 H23 119.6 . . ?
C23 C24 C19 120.4(3) . . ?
C23 C24 H24 119.8 . . ?
C19 C24 H24 119.8 . . ?
C26 C25 C30 118.2(3) . . ?
C26 C25 P2 124.4(2) . . ?
C30 C25 P2 117.3(2) . . ?
C27 C26 C25 120.5(3) . . ?
C27 C26 H26 119.8 . . ?
C25 C26 H26 119.8 . . ?
C26 C27 C28 120.6(3) . . ?
C26 C27 H27 119.7 . . ?
C28 C27 H27 119.7 . . ?
C29 C28 C27 120.0(3) . . ?
C29 C28 H28 120.0 . . ?
C27 C28 H28 120.0 . . ?
C28 C29 C30 120.3(3) . . ?
C28 C29 H29 119.9 . . ?
C30 C29 H29 119.9 . . ?
C29 C30 C25 120.5(3) . . ?
C29 C30 H30 119.8 . . ?
C25 C30 H30 119.8 . . ?
C32 C31 C36 118.3(3) . . ?
C32 C31 P2 124.1(3) . . ?
C36 C31 P2 117.5(3) . . ?
C31 C32 C33 120.8(4) . . ?
C31 C32 H32 119.6 . . ?
C33 C32 H32 119.6 . . ?
C34 C33 C32 120.1(4) . . ?
C34 C33 H33 119.9 . . ?
C32 C33 H33 119.9 . . ?
C33 C34 C35 120.2(3) . . ?
C33 C34 H34 119.9 . . ?
C35 C34 H34 119.9 . . ?
C34 C35 C36 120.3(4) . . ?
C34 C35 H35 119.9 . . ?
C36 C35 H35 119.9 . . ?
C35 C36 C31 120.3(4) . . ?
C35 C36 H36 119.8 . . ?
C31 C36 H36 119.8 . . ?
N1 C37 C38 111.5(3) . . ?
N1 C37 H37A 109.3 . . ?
C38 C37 H37A 109.3 . . ?
N1 C37 H37B 109.3 . . ?
C38 C37 H37B 109.3 . . ?
H37A C37 H37B 108.0 . . ?
C43 C38 C39 118.2(4) . . ?
C43 C38 C37 121.1(4) . . ?
C39 C38 C37 120.6(4) . . ?
C38 C39 C40 120.8(4) . . ?
C38 C39 H39 119.6 . . ?
C40 C39 H39 119.6 . . ?
C41 C40 C39 120.0(4) . . ?
C41 C40 H40 120.0 . . ?
C39 C40 H40 120.0 . . ?
C40 C41 C42 119.0(4) . . ?
C40 C41 H41 120.5 . . ?
C42 C41 H41 120.5 . . ?
C41 C42 C43 121.0(4) . . ?
C41 C42 H42 119.5 . . ?
C43 C42 H42 119.5 . . ?
C38 C43 C42 121.0(4) . . ?
C38 C43 H43 119.5 . . ?
C42 C43 H43 119.5 . . ?
N2 C44 C45 111.5(4) . . ?
N2 C44 H44A 109.3 . . ?
C45 C44 H44A 109.3 . . ?
N2 C44 H44B 109.3 . . ?
C45 C44 H44B 109.3 . . ?
H44A C44 H44B 108.0 . . ?
C46 C45 C50 117.7(4) . . ?
C46 C45 C44 121.7(4) . . ?
C50 C45 C44 120.5(4) . . ?
C45 C46 C47 121.1(4) . . ?
C45 C46 H46 119.5 . . ?
C47 C46 H46 119.5 . . ?
C48 C47 C46 119.9(4) . . ?
C48 C47 H47 120.0 . . ?
C46 C47 H47 120.0 . . ?
C49 C48 C47 120.3(5) . . ?
C49 C48 H48 119.9 . . ?
C47 C48 H48 119.9 . . ?
C48 C49 C50 119.6(5) . . ?
C48 C49 H49 120.2 . . ?
C50 C49 H49 120.2 . . ?
C45 C50 C49 121.4(5) . . ?
C45 C50 H50 119.3 . . ?
C49 C50 H50 119.3 . . ?
P4A P4B F5B 126.1(13) . . ?
P4A P4B P4B 4.2(8) . 2 ?
F5B P4B P4B 130.2(10) . 2 ?
P4A P4B F5A 164.0(11) . . ?
F5B P4B F5A 69.9(10) . . ?
P4B P4B F5A 159.9(6) 2 . ?
P4A P4B F6A 92.6(7) . 2 ?
F5B P4B F6A 40.5(8) . 2 ?
P4B P4B F6A 96.0(4) 2 2 ?
F5A P4B F6A 102.4(7) . 2 ?
P4A P4B F6B 93.6(6) . . ?
F5B P4B F6B 73.9(9) . . ?
P4B P4B F6B 95.6(5) 2 . ?
F5A P4B F6B 89.9(6) . . ?
F6A P4B F6B 97.2(5) 2 . ?
P4A P4B F4 76.2(7) . 2 ?
F5B P4B F4 127.6(9) . 2 ?
P4B P4B F4 73.1(4) 2 2 ?
F5A P4B F4 95.1(6) . 2 ?
F6A P4B F4 102.4(4) 2 2 ?
F6B P4B F4 158.2(5) . 2 ?
P4A P4B F4 69.7(7) . . ?
F5B P4B F4 147.6(10) . . ?
P4B P4B F4 66.6(4) 2 . ?
F5A P4B F4 96.0(6) . . ?
F6A P4B F4 160.7(5) 2 . ?
F6B P4B F4 77.2(4) . . ?
F4 P4B F4 81.2(5) 2 . ?
P4A P4B F5B 18.4(8) . 2 ?
F5B P4B F5B 109.0(14) . 2 ?
P4B P4B F5B 22.5(5) 2 2 ?
F5A P4B F5B 171.4(7) . 2 ?
F6A P4B F5B 80.3(5) 2 2 ?
F6B P4B F5B 81.7(6) . 2 ?
F4 P4B F5B 92.2(5) 2 2 ?
F4 P4B F5B 80.6(5) . 2 ?
P4A P4B F6A 46.3(6) . . ?
F5B P4B F6A 90.7(9) . . ?
P4B P4B F6A 49.7(3) 2 . ?
F5A P4B F6A 141.8(6) . . ?
F6A P4B F6A 79.1(5) 2 . ?
F6B P4B F6A 52.5(4) . . ?
F4 P4B F6A 122.2(4) 2 . ?
F4 P4B F6A 83.0(4) . . ?
F5B P4B F6A 30.2(4) 2 . ?
P4A P4B F6B 48.9(5) . 2 ?
F5B P4B F6B 92.6(10) . 2 ?
P4B P4B F6B 50.7(4) 2 2 ?
F5A P4B F6B 139.7(6) . 2 ?
F6A P4B F6B 52.1(4) 2 2 ?
F6B P4B F6B 120.6(6) . 2 ?
F4 P4B F6B 66.7(4) 2 2 ?
F4 P4B F6B 114.8(4) . 2 ?
F5B P4B F6B 48.0(4) 2 2 ?
F6A P4B F6B 70.8(4) . 2 ?
P4B F6B F5B 34.6(5) . . ?
P4B F6B F6A 77.2(5) . . ?
F5B F6B F6A 87.1(6) . . ?
P4B F6B P4A 19.4(2) . . ?
F5B F6B P4A 48.3(5) . . ?
F6A F6B P4A 59.5(4) . . ?
P4B F6B P4B 33.7(4) . 2 ?
F5B F6B P4B 61.3(6) . 2 ?
F6A F6B P4B 48.0(4) . 2 ?
P4A F6B P4B 14.48(17) . 2 ?
 
loop_
 _geom_torsion_atom_site_label_1
 _geom_torsion_atom_site_label_2
 _geom_torsion_atom_site_label_3
 _geom_torsion_atom_site_label_4
 _geom_torsion
 _geom_torsion_site_symmetry_1
 _geom_torsion_site_symmetry_2
 _geom_torsion_site_symmetry_3
 _geom_torsion_site_symmetry_4
 _geom_torsion_publ_flag
N2 Rh1 P1 C7 -119.60(17) . . . . ?
N1 Rh1 P1 C7 -87(3) . . . . ?
P2 Rh1 P1 C7 61.81(12) . . . . ?
N2 Rh1 P1 C13 115.39(17) . . . . ?
N1 Rh1 P1 C13 148(3) . . . . ?
P2 Rh1 P1 C13 -63.20(12) . . . . ?
N2 Rh1 P1 C1 -2.24(17) . . . . ?
N1 Rh1 P1 C1 30(3) . . . . ?
P2 Rh1 P1 C1 179.17(12) . . . . ?
N2 Rh1 P2 C25 81.5(10) . . . . ?
N1 Rh1 P2 C25 68.07(13) . . . . ?
P1 Rh1 P2 C25 -110.99(11) . . . . ?
N2 Rh1 P2 C31 -34.2(10) . . . . ?
N1 Rh1 P2 C31 -47.61(14) . . . . ?
P1 Rh1 P2 C31 133.33(11) . . . . ?
N2 Rh1 P2 C19 -153.9(10) . . . . ?
N1 Rh1 P2 C19 -167.33(15) . . . . ?
P1 Rh1 P2 C19 13.61(13) . . . . ?
P4B P4A F4 P4B 174.2(10) . . . 2 ?
F5B P4A F4 P4B -27.6(8) 2 . . 2 ?
F5B P4A F4 P4B -165.7(10) . . . 2 ?
F4 P4A F4 P4B 91.0(6) 2 . . 2 ?
F6A P4A F4 P4B -65.9(6) . . . 2 ?
F6A P4A F4 P4B -167.5(13) 2 . . 2 ?
F6B P4A F4 P4B -119.6(7) . . . 2 ?
F6B P4A F4 P4B 32.1(8) 2 . . 2 ?
F5A P4A F4 P4B 169.0(7) . . . 2 ?
F5A P4A F4 P4B 9.7(7) 2 . . 2 ?
P4B P4A F4 P4B -174.2(10) 2 . . . ?
F5B P4A F4 P4B 158.1(10) 2 . . . ?
F5B P4A F4 P4B 20.1(8) . . . . ?
F4 P4A F4 P4B -83.2(6) 2 . . . ?
F6A P4A F4 P4B 119.9(7) . . . . ?
F6A P4A F4 P4B 18.3(9) 2 . . . ?
F6B P4A F4 P4B 66.2(7) . . . . ?
F6B P4A F4 P4B -142.1(10) 2 . . . ?
F5A P4A F4 P4B -5.2(7) . . . . ?
F5A P4A F4 P4B -164.5(7) 2 . . . ?
P4B P4A F5A P4B -173.4(17) 2 . . . ?
F5B P4A F5A P4B 46(4) 2 . . . ?
F5B P4A F5A P4B 4(3) . . . . ?
F4 P4A F5A P4B -120(3) 2 . . . ?
F4 P4A F5A P4B 152(3) . . . . ?
F6A P4A F5A P4B 58(3) . . . . ?
F6A P4A F5A P4B -19(3) 2 . . . ?
F6B P4A F5A P4B 73(3) . . . . ?
F6B P4A F5A P4B -56(3) 2 . . . ?
F5A P4A F5A P4B -164(3) 2 . . . ?
P4B P4A F5A F5B -177.2(17) 2 . . . ?
P4B P4A F5A F5B -4(3) . . . . ?
F5B P4A F5A F5B 42(3) 2 . . . ?
F4 P4A F5A F5B -124.1(9) 2 . . . ?
F4 P4A F5A F5B 148.2(9) . . . . ?
F6A P4A F5A F5B 54.5(10) . . . . ?
F6A P4A F5A F5B -22.5(9) 2 . . . ?
F6B P4A F5A F5B 69.4(9) . . . . ?
F6B P4A F5A F5B -60.0(11) 2 . . . ?
F5A P4A F5A F5B -168.3(9) 2 . . . ?
P4A F5A F5B P4B 0.5(3) . . . . ?
P4B F5A F5B F6A 83(2) . . . 2 ?
P4A F5A F5B F6A 84(2) . . . 2 ?
P4B F5A F5B P4A -0.5(3) . . . . ?
P4B F5A F5B F6B -70.6(8) . . . . ?
P4A F5A F5B F6B -70.2(6) . . . . ?
P4B F5A F5B P4B -0.2(5) . . . 2 ?
P4A F5A F5B P4B 0.28(17) . . . 2 ?
P4B P4A F5B P4B 176.6(8) 2 . . . ?
F5B P4A F5B P4B -168.3(14) 2 . . . ?
F4 P4A F5B P4B 55.0(13) 2 . . . ?
F4 P4A F5B P4B -37.7(14) . . . . ?
F6A P4A F5B P4B -139.9(12) . . . . ?
F6A P4A F5B P4B 141.1(18) 2 . . . ?
F6B P4A F5B P4B -90.5(13) . . . . ?
F6B P4A F5B P4B 132.1(12) 2 . . . ?
F5A P4A F5B P4B -1.3(9) . . . . ?
F5A P4A F5B P4B 158(2) 2 . . . ?
P4B P4A F5B F6A 35(2) 2 . . 2 ?
P4B P4A F5B F6A -141.1(18) . . . 2 ?
F5B P4A F5B F6A 50.6(8) 2 . . 2 ?
F4 P4A F5B F6A -86.2(10) 2 . . 2 ?
F4 P4A F5B F6A -178.8(7) . . . 2 ?
F6A P4A F5B F6A 79.0(10) . . . 2 ?
F6B P4A F5B F6A 128.4(12) . . . 2 ?
F6B P4A F5B F6A -9.0(10) 2 . . 2 ?
F5A P4A F5B F6A -142.5(15) . . . 2 ?
F5A P4A F5B F6A 17(3) 2 . . 2 ?
P4B P4A F5B F5A 177.9(13) 2 . . . ?
P4B P4A F5B F5A 1.3(9) . . . . ?
F5B P4A F5B F5A -167.0(10) 2 . . . ?
F4 P4A F5B F5A 56.3(9) 2 . . . ?
F4 P4A F5B F5A -36.4(10) . . . . ?
F6A P4A F5B F5A -138.5(8) . . . . ?
F6A P4A F5B F5A 142.5(15) 2 . . . ?
F6B P4A F5B F5A -89.1(9) . . . . ?
F6B P4A F5B F5A 133.4(8) 2 . . . ?
F5A P4A F5B F5A 159.3(19) 2 . . . ?
P4B P4A F5B F6B -93.0(17) 2 . . . ?
P4B P4A F5B F6B 90.5(13) . . . . ?
F5B P4A F5B F6B -77.8(5) 2 . . . ?
F4 P4A F5B F6B 145.4(5) 2 . . . ?
F4 P4A F5B F6B 52.8(8) . . . . ?
F6A P4A F5B F6B -49.4(5) . . . . ?
F6A P4A F5B F6B -128.4(12) 2 . . . ?
F6B P4A F5B F6B -137.4(7) 2 . . . ?
F5A P4A F5B F6B 89.1(9) . . . . ?
F5A P4A F5B F6B -112(2) 2 . . . ?
P4B P4A F5B P4B -176.6(8) . . . 2 ?
F5B P4A F5B P4B 15.1(18) 2 . . 2 ?
F4 P4A F5B P4B -121.6(17) 2 . . 2 ?
F4 P4A F5B P4B 145.7(19) . . . 2 ?
F6A P4A F5B P4B 43.6(16) . . . 2 ?
F6A P4A F5B P4B -35(2) 2 . . 2 ?
F6B P4A F5B P4B 93.0(17) . . . 2 ?
F6B P4A F5B P4B -44.5(16) 2 . . 2 ?
F5A P4A F5B P4B -177.9(13) . . . 2 ?
F5A P4A F5B P4B -18.6(19) 2 . . 2 ?
P4B P4A F6A F5B 22.5(11) 2 . . 2 ?
P4B P4A F6A F5B -163.1(13) . . . 2 ?
F5B P4A F6A F5B -138.5(12) . . . 2 ?
F4 P4A F6A F5B 2.6(15) 2 . . 2 ?
F4 P4A F6A F5B 101.5(11) . . . 2 ?
F6A P4A F6A F5B -101.4(11) 2 . . 2 ?
F6B P4A F6A F5B 169.3(11) . . . 2 ?
F6B P4A F6A F5B -43.6(11) 2 . . 2 ?
F5A P4A F6A F5B -174.1(12) . . . 2 ?
F5A P4A F6A F5B 26.3(11) 2 . . 2 ?
P4B P4A F6A P4B 174.5(10) . . . 2 ?
F5B P4A F6A P4B -22.5(11) 2 . . 2 ?
F5B P4A F6A P4B -161.0(9) . . . 2 ?
F4 P4A F6A P4B -19.9(10) 2 . . 2 ?
F4 P4A F6A P4B 79.0(6) . . . 2 ?
F6A P4A F6A P4B -123.8(7) 2 . . 2 ?
F6B P4A F6A P4B 146.9(7) . . . 2 ?
F6B P4A F6A P4B -66.0(6) 2 . . 2 ?
F5A P4A F6A P4B 163.5(8) . . . 2 ?
F5A P4A F6A P4B 3.9(7) 2 . . 2 ?
P4B P4A F6A F6B -146.9(7) 2 . . . ?
P4B P4A F6A F6B 27.6(8) . . . . ?
F5B P4A F6A F6B -169.3(11) 2 . . . ?
F5B P4A F6A F6B 52.1(7) . . . . ?
F4 P4A F6A F6B -166.8(9) 2 . . . ?
F4 P4A F6A F6B -67.9(4) . . . . ?
F6A P4A F6A F6B 89.3(5) 2 . . . ?
F6B P4A F6A F6B 147.1(5) 2 . . . ?
F5A P4A F6A F6B 16.6(7) . . . . ?
F5A P4A F6A F6B -143.0(5) 2 . . . ?
P4B P4A F6A P4B -174.5(10) 2 . . . ?
F5B P4A F6A P4B 163.1(13) 2 . . . ?
F5B P4A F6A P4B 24.6(9) . . . . ?
F4 P4A F6A P4B 165.7(14) 2 . . . ?
F4 P4A F6A P4B -95.4(7) . . . . ?
F6A P4A F6A P4B 61.7(8) 2 . . . ?
F6B P4A F6A P4B -27.6(8) . . . . ?
F6B P4A F6A P4B 119.5(8) 2 . . . ?
F5A P4A F6A P4B -11.0(7) . . . . ?
F5A P4A F6A P4B -170.6(8) 2 . . . ?
N2 Rh1 N1 C37 -58.1(3) . . . . ?
P1 Rh1 N1 C37 -90(3) . . . . ?
P2 Rh1 N1 C37 120.4(3) . . . . ?
N1 Rh1 N2 C44 -70.9(3) . . . . ?
P1 Rh1 N2 C44 108.1(3) . . . . ?
P2 Rh1 N2 C44 -84.3(11) . . . . ?
C7 P1 C1 C2 -144.8(3) . . . . ?
C13 P1 C1 C2 -34.3(3) . . . . ?
Rh1 P1 C1 C2 88.8(3) . . . . ?
C7 P1 C1 C6 35.3(3) . . . . ?
C13 P1 C1 C6 145.7(3) . . . . ?
Rh1 P1 C1 C6 -91.1(3) . . . . ?
C6 C1 C2 C3 -0.9(6) . . . . ?
P1 C1 C2 C3 179.2(3) . . . . ?
C1 C2 C3 C4 -0.7(7) . . . . ?
C2 C3 C4 C5 1.7(7) . . . . ?
C3 C4 C5 C6 -1.2(7) . . . . ?
C4 C5 C6 C1 -0.5(6) . . . . ?
C2 C1 C6 C5 1.5(6) . . . . ?
P1 C1 C6 C5 -178.6(3) . . . . ?
C13 P1 C7 C12 131.8(3) . . . . ?
C1 P1 C7 C12 -122.5(3) . . . . ?
Rh1 P1 C7 C12 4.5(3) . . . . ?
C13 P1 C7 C8 -50.7(3) . . . . ?
C1 P1 C7 C8 54.9(3) . . . . ?
Rh1 P1 C7 C8 -178.0(2) . . . . ?
C12 C7 C8 C9 -4.0(5) . . . . ?
P1 C7 C8 C9 178.5(3) . . . . ?
C7 C8 C9 C10 1.9(5) . . . . ?
C8 C9 C10 C11 1.3(6) . . . . ?
C9 C10 C11 C12 -2.2(6) . . . . ?
C8 C7 C12 C11 3.1(5) . . . . ?
P1 C7 C12 C11 -179.3(3) . . . . ?
C10 C11 C12 C7 0.0(5) . . . . ?
C7 P1 C13 C14 5.8(3) . . . . ?
C1 P1 C13 C14 -98.0(3) . . . . ?
Rh1 P1 C13 C14 135.4(3) . . . . ?
C7 P1 C13 C18 -173.1(2) . . . . ?
C1 P1 C13 C18 83.2(3) . . . . ?
Rh1 P1 C13 C18 -43.4(3) . . . . ?
C18 C13 C14 C15 -0.4(5) . . . . ?
P1 C13 C14 C15 -179.2(3) . . . . ?
C13 C14 C15 C16 -0.3(5) . . . . ?
C14 C15 C16 C17 0.3(6) . . . . ?
C15 C16 C17 C18 0.4(6) . . . . ?
C16 C17 C18 C13 -1.1(5) . . . . ?
C14 C13 C18 C17 1.1(5) . . . . ?
P1 C13 C18 C17 180.0(3) . . . . ?
C25 P2 C19 C24 -144.1(3) . . . . ?
C31 P2 C19 C24 -36.3(3) . . . . ?
Rh1 P2 C19 C24 87.8(3) . . . . ?
C25 P2 C19 C20 37.4(3) . . . . ?
C31 P2 C19 C20 145.1(3) . . . . ?
Rh1 P2 C19 C20 -90.7(3) . . . . ?
C24 C19 C20 C21 0.9(5) . . . . ?
P2 C19 C20 C21 179.4(3) . . . . ?
C19 C20 C21 C22 -1.0(6) . . . . ?
C20 C21 C22 C23 0.4(6) . . . . ?
C21 C22 C23 C24 0.3(6) . . . . ?
C22 C23 C24 C19 -0.3(5) . . . . ?
C20 C19 C24 C23 -0.2(5) . . . . ?
P2 C19 C24 C23 -178.8(3) . . . . ?
C31 P2 C25 C26 -68.8(3) . . . . ?
C19 P2 C25 C26 35.0(3) . . . . ?
Rh1 P2 C25 C26 172.4(2) . . . . ?
C31 P2 C25 C30 112.8(3) . . . . ?
C19 P2 C25 C30 -143.4(2) . . . . ?
Rh1 P2 C25 C30 -6.0(3) . . . . ?
C30 C25 C26 C27 0.0(5) . . . . ?
P2 C25 C26 C27 -178.4(3) . . . . ?
C25 C26 C27 C28 0.8(6) . . . . ?
C26 C27 C28 C29 -1.5(6) . . . . ?
C27 C28 C29 C30 1.4(6) . . . . ?
C28 C29 C30 C25 -0.5(5) . . . . ?
C26 C25 C30 C29 -0.1(5) . . . . ?
P2 C25 C30 C29 178.4(2) . . . . ?
C25 P2 C31 C32 20.8(3) . . . . ?
C19 P2 C31 C32 -84.9(3) . . . . ?
Rh1 P2 C31 C32 140.2(3) . . . . ?
C25 P2 C31 C36 -162.3(3) . . . . ?
C19 P2 C31 C36 92.0(3) . . . . ?
Rh1 P2 C31 C36 -42.9(3) . . . . ?
C36 C31 C32 C33 -0.7(6) . . . . ?
P2 C31 C32 C33 176.2(3) . . . . ?
C31 C32 C33 C34 0.1(6) . . . . ?
C32 C33 C34 C35 0.0(7) . . . . ?
C33 C34 C35 C36 0.5(6) . . . . ?
C34 C35 C36 C31 -1.1(6) . . . . ?
C32 C31 C36 C35 1.2(5) . . . . ?
P2 C31 C36 C35 -175.9(3) . . . . ?
Rh1 N1 C37 C38 -165.9(3) . . . . ?
N1 C37 C38 C43 -96.6(4) . . . . ?
N1 C37 C38 C39 78.4(5) . . . . ?
C43 C38 C39 C40 -1.5(6) . . . . ?
C37 C38 C39 C40 -176.7(4) . . . . ?
C38 C39 C40 C41 1.1(7) . . . . ?
C39 C40 C41 C42 0.1(7) . . . . ?
C40 C41 C42 C43 -0.7(8) . . . . ?
C39 C38 C43 C42 0.8(7) . . . . ?
C37 C38 C43 C42 176.0(4) . . . . ?
C41 C42 C43 C38 0.3(8) . . . . ?
Rh1 N2 C44 C45 175.8(3) . . . . ?
N2 C44 C45 C46 -106.0(5) . . . . ?
N2 C44 C45 C50 72.3(7) . . . . ?
C50 C45 C46 C47 -0.3(8) . . . . ?
C44 C45 C46 C47 178.1(4) . . . . ?
C45 C46 C47 C48 -0.1(7) . . . . ?
C46 C47 C48 C49 0.7(8) . . . . ?
C47 C48 C49 C50 -0.9(11) . . . . ?
C46 C45 C50 C49 0.2(11) . . . . ?
C44 C45 C50 C49 -178.3(7) . . . . ?
C48 C49 C50 C45 0.5(13) . . . . ?
P4B P4A P4B F5B -169.8(12) 2 . . . ?
F5B P4A P4B F5B 23(3) 2 . . . ?
F4 P4A P4B F5B -126.8(13) 2 . . . ?
F4 P4A P4B F5B 147.6(12) . . . . ?
F6A P4A P4B F5B 47.6(13) . . . . ?
F6A P4A P4B F5B -24.7(12) 2 . . . ?
F6B P4A P4B F5B 72.7(12) . . . . ?
F6B P4A P4B F5B -55.8(15) 2 . . . ?
F5A P4A P4B F5B 175(3) . . . . ?
F5A P4A P4B F5B -161.1(17) 2 . . . ?
F5B P4A P4B P4B -166.8(16) 2 . . 2 ?
F5B P4A P4B P4B 169.8(12) . . . 2 ?
F4 P4A P4B P4B 43.0(2) 2 . . 2 ?
F4 P4A P4B P4B -42.6(2) . . . 2 ?
F6A P4A P4B P4B -142.7(5) . . . 2 ?
F6A P4A P4B P4B 145.1(3) 2 . . 2 ?
F6B P4A P4B P4B -117.5(4) . . . 2 ?
F6B P4A P4B P4B 114.0(6) 2 . . 2 ?
F5A P4A P4B P4B -15(3) . . . 2 ?
F5A P4A P4B P4B 8.7(16) 2 . . 2 ?
P4B P4A P4B F5A 15(3) 2 . . . ?
F5B P4A P4B F5A -152(3) 2 . . . ?
F5B P4A P4B F5A -175(3) . . . . ?
F4 P4A P4B F5A 58(3) 2 . . . ?
F4 P4A P4B F5A -28(3) . . . . ?
F6A P4A P4B F5A -128(3) . . . . ?
F6A P4A P4B F5A 160(3) 2 . . . ?
F6B P4A P4B F5A -102(3) . . . . ?
F6B P4A P4B F5A 129(3) 2 . . . ?
F5A P4A P4B F5A 24(4) 2 . . . ?
P4B P4A P4B F6A -145.1(3) 2 . . 2 ?
F5B P4A P4B F6A 48.1(17) 2 . . 2 ?
F5B P4A P4B F6A 24.7(12) . . . 2 ?
F4 P4A P4B F6A -102.1(4) 2 . . 2 ?
F4 P4A P4B F6A 172.3(4) . . . 2 ?
F6A P4A P4B F6A 72.2(7) . . . 2 ?
F6B P4A P4B F6A 97.4(5) . . . 2 ?
F6B P4A P4B F6A -31.1(8) 2 . . 2 ?
F5A P4A P4B F6A -160(3) . . . 2 ?
F5A P4A P4B F6A -136.4(15) 2 . . 2 ?
P4B P4A P4B F6B 117.5(4) 2 . . . ?
F5B P4A P4B F6B -49.3(18) 2 . . . ?
F5B P4A P4B F6B -72.7(12) . . . . ?
F4 P4A P4B F6B 160.5(5) 2 . . . ?
F4 P4A P4B F6B 74.9(5) . . . . ?
F6A P4A P4B F6B -25.1(7) . . . . ?
F6A P4A P4B F6B -97.4(5) 2 . . . ?
F6B P4A P4B F6B -128.5(8) 2 . . . ?
F5A P4A P4B F6B 102(3) . . . . ?
F5A P4A P4B F6B 126.2(15) 2 . . . ?
P4B P4A P4B F4 -43.0(2) 2 . . 2 ?
F5B P4A P4B F4 150.2(16) 2 . . 2 ?
F5B P4A P4B F4 126.8(12) . . . 2 ?
F4 P4A P4B F4 -85.6(5) . . . 2 ?
F6A P4A P4B F4 174.3(5) . . . 2 ?
F6A P4A P4B F4 102.1(4) 2 . . 2 ?
F6B P4A P4B F4 -160.5(5) . . . 2 ?
F6B P4A P4B F4 71.0(6) 2 . . 2 ?
F5A P4A P4B F4 -58(3) . . . 2 ?
F5A P4A P4B F4 -34.3(16) 2 . . 2 ?
P4B P4A P4B F4 42.6(2) 2 . . . ?
F5B P4A P4B F4 -124.2(16) 2 . . . ?
F5B P4A P4B F4 -147.6(12) . . . . ?
F4 P4A P4B F4 85.6(5) 2 . . . ?
F6A P4A P4B F4 -100.0(5) . . . . ?
F6A P4A P4B F4 -172.3(4) 2 . . . ?
F6B P4A P4B F4 -74.9(5) . . . . ?
F6B P4A P4B F4 156.6(7) 2 . . . ?
F5A P4A P4B F4 28(3) . . . . ?
F5A P4A P4B F4 51.3(16) 2 . . . ?
P4B P4A P4B F5B 166.8(16) 2 . . 2 ?
F5B P4A P4B F5B -23(3) . . . 2 ?
F4 P4A P4B F5B -150.2(16) 2 . . 2 ?
F4 P4A P4B F5B 124.2(16) . . . 2 ?
F6A P4A P4B F5B 24.1(15) . . . 2 ?
F6A P4A P4B F5B -48.1(17) 2 . . 2 ?
F6B P4A P4B F5B 49.3(18) . . . 2 ?
F6B P4A P4B F5B -79.2(18) 2 . . 2 ?
F5A P4A P4B F5B 152(3) . . . 2 ?
F5A P4A P4B F5B 176(3) 2 . . 2 ?
P4B P4A P4B F6A 142.7(5) 2 . . . ?
F5B P4A P4B F6A -24.1(15) 2 . . . ?
F5B P4A P4B F6A -47.6(13) . . . . ?
F4 P4A P4B F6A -174.3(5) 2 . . . ?
F4 P4A P4B F6A 100.0(5) . . . . ?
F6A P4A P4B F6A -72.2(7) 2 . . . ?
F6B P4A P4B F6A 25.1(7) . . . . ?
F6B P4A P4B F6A -103.3(9) 2 . . . ?
F5A P4A P4B F6A 128(3) . . . . ?
F5A P4A P4B F6A 151.4(19) 2 . . . ?
P4B P4A P4B F6B -114.0(6) 2 . . 2 ?
F5B P4A P4B F6B 79.2(18) 2 . . 2 ?
F5B P4A P4B F6B 55.8(15) . . . 2 ?
F4 P4A P4B F6B -71.0(6) 2 . . 2 ?
F4 P4A P4B F6B -156.6(7) . . . 2 ?
F6A P4A P4B F6B 103.3(9) . . . 2 ?
F6A P4A P4B F6B 31.1(8) 2 . . 2 ?
F6B P4A P4B F6B 128.5(8) . . . 2 ?
F5A P4A P4B F6B -129(3) . . . 2 ?
F5A P4A P4B F6B -105.3(16) 2 . . 2 ?
F6A F5B P4B P4A 39.9(18) 2 . . . ?
F5A F5B P4B P4A -178.6(10) . . . . ?
F6B F5B P4B P4A -82.6(11) . . . . ?
P4B F5B P4B P4A 1.0(2) 2 . . . ?
F6A F5B P4B P4B 38.9(19) 2 . . 2 ?
F5A F5B P4B P4B -179.6(11) . . . 2 ?
P4A F5B P4B P4B -1.0(2) . . . 2 ?
F6B F5B P4B P4B -83.6(12) . . . 2 ?
F6A F5B P4B F5A -141.5(15) 2 . . . ?
P4A F5B P4B F5A 178.6(10) . . . . ?
F6B F5B P4B F5A 96.0(8) . . . . ?
P4B F5B P4B F5A 179.6(11) 2 . . . ?
F5A F5B P4B F6A 141.5(15) . . . 2 ?
P4A F5B P4B F6A -39.9(18) . . . 2 ?
F6B F5B P4B F6A -122.5(13) . . . 2 ?
P4B F5B P4B F6A -38.9(19) 2 . . 2 ?
F6A F5B P4B F6B 122.5(13) 2 . . . ?
F5A F5B P4B F6B -96.0(8) . . . . ?
P4A F5B P4B F6B 82.6(11) . . . . ?
P4B F5B P4B F6B 83.6(12) 2 . . . ?
F6A F5B P4B F4 -60.9(17) 2 . . 2 ?
F5A F5B P4B F4 80.6(12) . . . 2 ?
P4A F5B P4B F4 -100.9(15) . . . 2 ?
F6B F5B P4B F4 176.5(9) . . . 2 ?
P4B F5B P4B F4 -99.9(15) 2 . . 2 ?
F6A F5B P4B F4 150.2(12) 2 . . . ?
F5A F5B P4B F4 -68.3(19) . . . . ?
P4A F5B P4B F4 110(2) . . . . ?
F6B F5B P4B F4 27.6(19) . . . . ?
P4B F5B P4B F4 111(2) 2 . . . ?
F6A F5B P4B F5B 47.5(11) 2 . . 2 ?
F5A F5B P4B F5B -171.0(8) . . . 2 ?
P4A F5B P4B F5B 7.6(9) . . . 2 ?
F6B F5B P4B F5B -75.0(4) . . . 2 ?
P4B F5B P4B F5B 8.6(10) 2 . . 2 ?
F6A F5B P4B F6A 72.1(12) 2 . . . ?
F5A F5B P4B F6A -146.4(7) . . . . ?
P4A F5B P4B F6A 32.2(9) . . . . ?
F6B F5B P4B F6A -50.4(4) . . . . ?
P4B F5B P4B F6A 33.2(10) 2 . . . ?
F6A F5B P4B F6B 1.4(12) 2 . . 2 ?
F5A F5B P4B F6B 142.9(7) . . . 2 ?
P4A F5B P4B F6B -38.6(9) . . . 2 ?
F6B F5B P4B F6B -121.2(5) . . . 2 ?
P4B F5B P4B F6B -37.6(10) 2 . . 2 ?
F5B F5A P4B P4A 176(3) . . . . ?
P4A F5A P4B F5B -176(3) . . . . ?
F5B F5A P4B P4B 179(100) . . . 2 ?
P4A F5A P4B P4B 3.2(10) . . . 2 ?
F5B F5A P4B F6A -24.5(10) . . . 2 ?
P4A F5A P4B F6A 160(3) . . . 2 ?
F5B F5A P4B F6B 72.9(9) . . . . ?
P4A F5A P4B F6B -103(3) . . . . ?
F5B F5A P4B F4 -128.4(10) . . . 2 ?
P4A F5A P4B F4 56(3) . . . 2 ?
F5B F5A P4B F4 150.0(10) . . . . ?
P4A F5A P4B F4 -26(3) . . . . ?
F5B F5A P4B F5B 84(6) . . . 2 ?
P4A F5A P4B F5B -92(6) . . . 2 ?
F5B F5A P4B F6A 63.6(12) . . . . ?
P4A F5A P4B F6A -112(3) . . . . ?
F5B F5A P4B F6B -69.0(13) . . . 2 ?
P4A F5A P4B F6B 115(3) . . . 2 ?
P4B F4 P4B P4A -3.1(6) 2 . . . ?
P4A F4 P4B F5B -126(2) . . . . ?
P4B F4 P4B F5B -129(2) 2 . . . ?
P4A F4 P4B P4B 3.1(6) . . . 2 ?
P4A F4 P4B F5A 172.6(9) . . . . ?
P4B F4 P4B F5A 169.5(7) 2 . . . ?
P4A F4 P4B F6A -24.0(13) . . . 2 ?
P4B F4 P4B F6A -27.1(14) 2 . . 2 ?
P4A F4 P4B F6B -98.8(7) . . . . ?
P4B F4 P4B F6B -101.9(5) 2 . . . ?
P4A F4 P4B F4 78.4(6) . . . 2 ?
P4B F4 P4B F4 75.3(4) 2 . . 2 ?
P4A F4 P4B F5B -15.3(7) . . . 2 ?
P4B F4 P4B F5B -18.4(5) 2 . . 2 ?
P4A F4 P4B F6A -45.8(6) . . . . ?
P4B F4 P4B F6A -48.9(3) 2 . . . ?
P4A F4 P4B F6B 19.2(5) . . . 2 ?
P4B F4 P4B F6B 16.1(4) 2 . . 2 ?
F5B F6A P4B P4A 14.8(11) 2 . . . ?
P4B F6A P4B P4A -3.4(6) 2 . . . ?
F6B F6A P4B P4A -147.7(9) . . . . ?
F5B F6A P4B F5B -128.6(12) 2 . . . ?
P4B F6A P4B F5B -146.7(11) 2 . . . ?
F6B F6A P4B F5B 68.9(10) . . . . ?
P4A F6A P4B F5B -143.4(13) . . . . ?
F5B F6A P4B P4B 18.2(10) 2 . . 2 ?
F6B F6A P4B P4B -144.3(7) . . . 2 ?
P4A F6A P4B P4B 3.4(6) . . . 2 ?
F5B F6A P4B F5A 174.2(14) 2 . . . ?
P4B F6A P4B F5A 156.0(11) 2 . . . ?
F6B F6A P4B F5A 11.7(11) . . . . ?
P4A F6A P4B F5A 159.4(14) . . . . ?
F5B F6A P4B F6A -89.5(11) 2 . . 2 ?
P4B F6A P4B F6A -107.7(7) 2 . . 2 ?
F6B F6A P4B F6A 108.0(6) . . . 2 ?
P4A F6A P4B F6A -104.3(8) . . . 2 ?
F5B F6A P4B F6B 162.5(11) 2 . . . ?
P4B F6A P4B F6B 144.3(7) 2 . . . ?
P4A F6A P4B F6B 147.7(9) . . . . ?
F5B F6A P4B F4 8.3(11) 2 . . 2 ?
P4B F6A P4B F4 -9.9(5) 2 . . 2 ?
F6B F6A P4B F4 -154.2(6) . . . 2 ?
P4A F6A P4B F4 -6.5(6) . . . 2 ?
F5B F6A P4B F4 83.3(10) 2 . . . ?
P4B F6A P4B F4 65.1(4) 2 . . . ?
F6B F6A P4B F4 -79.2(5) . . . . ?
P4A F6A P4B F4 68.5(7) . . . . ?
P4B F6A P4B F5B -18.2(10) 2 . . 2 ?
F6B F6A P4B F5B -162.5(11) . . . 2 ?
P4A F6A P4B F5B -14.8(11) . . . 2 ?
F5B F6A P4B F6B -36.1(10) 2 . . 2 ?
P4B F6A P4B F6B -54.3(5) 2 . . 2 ?
F6B F6A P4B F6B 161.4(6) . . . 2 ?
P4A F6A P4B F6B -50.9(7) . . . 2 ?
P4A P4B F6B F5B 126.6(13) . . . . ?
P4B P4B F6B F5B 130.3(10) 2 . . . ?
F5A P4B F6B F5B -69.0(10) . . . . ?
F6A P4B F6B F5B 33.5(9) 2 . . . ?
F4 P4B F6B F5B -172.6(19) 2 . . . ?
F4 P4B F6B F5B -165.2(11) . . . . ?
F5B P4B F6B F5B 112.6(14) 2 . . . ?
F6A P4B F6B F5B 103.8(11) . . . . ?
F6B P4B F6B F5B 83.3(10) 2 . . . ?
P4A P4B F6B F6A 22.8(8) . . . . ?
F5B P4B F6B F6A -103.8(11) . . . . ?
P4B P4B F6B F6A 26.5(4) 2 . . . ?
F5A P4B F6B F6A -172.8(7) . . . . ?
F6A P4B F6B F6A -70.3(6) 2 . . . ?
F4 P4B F6B F6A 83.6(14) 2 . . . ?
F4 P4B F6B F6A 91.0(4) . . . . ?
F5B P4B F6B F6A 8.8(6) 2 . . . ?
F6B P4B F6B F6A -20.5(6) 2 . . . ?
F5B P4B F6B P4A -126.6(13) . . . . ?
P4B P4B F6B P4A 3.8(7) 2 . . . ?
F5A P4B F6B P4A 164.4(10) . . . . ?
F6A P4B F6B P4A -93.0(8) 2 . . . ?
F4 P4B F6B P4A 60.9(14) 2 . . . ?
F4 P4B F6B P4A 68.2(7) . . . . ?
F5B P4B F6B P4A -14.0(8) 2 . . . ?
F6A P4B F6B P4A -22.8(8) . . . . ?
F6B P4B F6B P4A -43.2(6) 2 . . . ?
P4A P4B F6B P4B -3.8(7) . . . 2 ?
F5B P4B F6B P4B -130.3(10) . . . 2 ?
F5A P4B F6B P4B 160.7(6) . . . 2 ?
F6A P4B F6B P4B -96.8(4) 2 . . 2 ?
F4 P4B F6B P4B 57.1(13) 2 . . 2 ?
F4 P4B F6B P4B 64.4(3) . . . 2 ?
F5B P4B F6B P4B -17.7(5) 2 . . 2 ?
F6A P4B F6B P4B -26.5(4) . . . 2 ?
F6B P4B F6B P4B -47.0(4) 2 . . 2 ?
F6A F5B F6B P4B -92.6(16) 2 . . . ?
F5A F5B F6B P4B 68.3(10) . . . . ?
P4A F5B F6B P4B -20.9(5) . . . . ?
P4B F5B F6B P4B -28.9(7) 2 . . . ?
P4B F5B F6B F6A 71.5(10) . . . . ?
F6A F5B F6B F6A -21.2(15) 2 . . . ?
F5A F5B F6B F6A 139.8(9) . . . . ?
P4A F5B F6B F6A 50.6(7) . . . . ?
P4B F5B F6B F6A 42.6(5) 2 . . . ?
P4B F5B F6B P4A 20.9(5) . . . . ?
F6A F5B F6B P4A -71.8(13) 2 . . . ?
F5A F5B F6B P4A 89.2(9) . . . . ?
P4B F5B F6B P4A -8.0(3) 2 . . . ?
P4B F5B F6B P4B 28.9(7) . . . 2 ?
F6A F5B F6B P4B -63.8(14) 2 . . 2 ?
F5A F5B F6B P4B 97.2(8) . . . 2 ?
P4A F5B F6B P4B 8.0(3) . . . 2 ?
F5B F6A F6B P4B -18.3(11) 2 . . . ?
P4B F6A F6B P4B -19.5(4) 2 . . . ?
P4A F6A F6B P4B -8.6(3) . . . . ?
F5B F6A F6B F5B -51.8(11) 2 . . . ?
P4B F6A F6B F5B -53.0(7) 2 . . . ?
P4A F6A F6B F5B -42.1(6) . . . . ?
P4B F6A F6B F5B -33.5(5) . . . . ?
F5B F6A F6B P4A -9.8(10) 2 . . . ?
P4B F6A F6B P4A -10.9(3) 2 . . . ?
P4B F6A F6B P4A 8.6(3) . . . . ?
F5B F6A F6B P4B 1.2(10) 2 . . 2 ?
P4A F6A F6B P4B 10.9(3) . . . 2 ?
P4B F6A F6B P4B 19.5(4) . . . 2 ?
P4B P4A F6B P4B -171.6(15) 2 . . . ?
F5B P4A F6B P4B 160.6(11) 2 . . . ?
F5B P4A F6B P4B 37.6(10) . . . . ?
F4 P4A F6B P4B -35.0(9) 2 . . . ?
F4 P4A F6B P4B -96.5(8) . . . . ?
F6A P4A F6B P4B 154.0(9) . . . . ?
F6A P4A F6B P4B 66.4(7) 2 . . . ?
F6B P4A F6B P4B 105.7(7) 2 . . . ?
F5A P4A F6B P4B -11.7(8) . . . . ?
F5A P4A F6B P4B -161.2(10) 2 . . . ?
P4B P4A F6B F5B 150.8(12) 2 . . . ?
P4B P4A F6B F5B -37.6(10) . . . . ?
F5B P4A F6B F5B 123.0(13) 2 . . . ?
F4 P4A F6B F5B -72.6(10) 2 . . . ?
F4 P4A F6B F5B -134.1(8) . . . . ?
F6A P4A F6B F5B 116.4(9) . . . . ?
F6A P4A F6B F5B 28.8(8) 2 . . . ?
F6B P4A F6B F5B 68.0(8) 2 . . . ?
F5A P4A F6B F5B -49.3(7) . . . . ?
F5A P4A F6B F5B 161.2(10) 2 . . . ?
P4B P4A F6B F6A 34.4(9) 2 . . . ?
P4B P4A F6B F6A -154.0(9) . . . . ?
F5B P4A F6B F6A 6.5(7) 2 . . . ?
F5B P4A F6B F6A -116.4(9) . . . . ?
F4 P4A F6B F6A 171.0(6) 2 . . . ?
F4 P4A F6B F6A 109.5(4) . . . . ?
F6A P4A F6B F6A -87.6(6) 2 . . . ?
F6B P4A F6B F6A -48.4(3) 2 . . . ?
F5A P4A F6B F6A -165.7(6) . . . . ?
F5A P4A F6B F6A 44.8(7) 2 . . . ?
P4B P4A F6B P4B 171.6(15) . . . 2 ?
F5B P4A F6B P4B -27.8(9) 2 . . 2 ?
F5B P4A F6B P4B -150.8(12) . . . 2 ?
F4 P4A F6B P4B 136.6(13) 2 . . 2 ?
F4 P4A F6B P4B 75.1(9) . . . 2 ?
F6A P4A F6B P4B -34.4(9) . . . 2 ?
F6A P4A F6B P4B -122.0(10) 2 . . 2 ?
F6B P4A F6B P4B -82.7(9) 2 . . 2 ?
F5A P4A F6B P4B 159.9(10) . . . 2 ?
F5A P4A F6B P4B 10.4(8) 2 . . 2 ?
 
_diffrn_measured_fraction_theta_max    0.843
_diffrn_reflns_theta_full              27.95
_diffrn_measured_fraction_theta_full   0.843
_refine_diff_density_max    1.016
_refine_diff_density_min   -1.240
_refine_diff_density_rms    0.083
